# Supplementary material
Source: Springer Nature journal article supplement (https://www.springermedizin.de/resource/supplementary/12889_2010_2187_MOESM3_ESM.pdf/9484900)

0

4

8

12

16

20

24

36 months

WP1: coordination: overall coordination of the project, progress and financial management

WP 2: Identification of most important energy balance-related behaviours

WP 3: Identification of personal and environmental determinants of energy balance-related behaviours

WP 4: Identifying determinants of parental involvement

WP 5: Identification of moderators and mediators of successful interventions

WP6: Exploring financial strategies to promote energy

WP7: Cross-European research on obesogenic family and school environments

WP 8: Developing an evidence-based intervention scheme to promote energy balance among 10-12 year olds

WP9: Evaluating the evidence-based intervention

WP 10: Preparing an implementation plan and disseminating the results

WP11: Store and manage all data

0

2

4

6

8

10

12

14

16

18

20

22

24

26

28

30

32

34

36 months

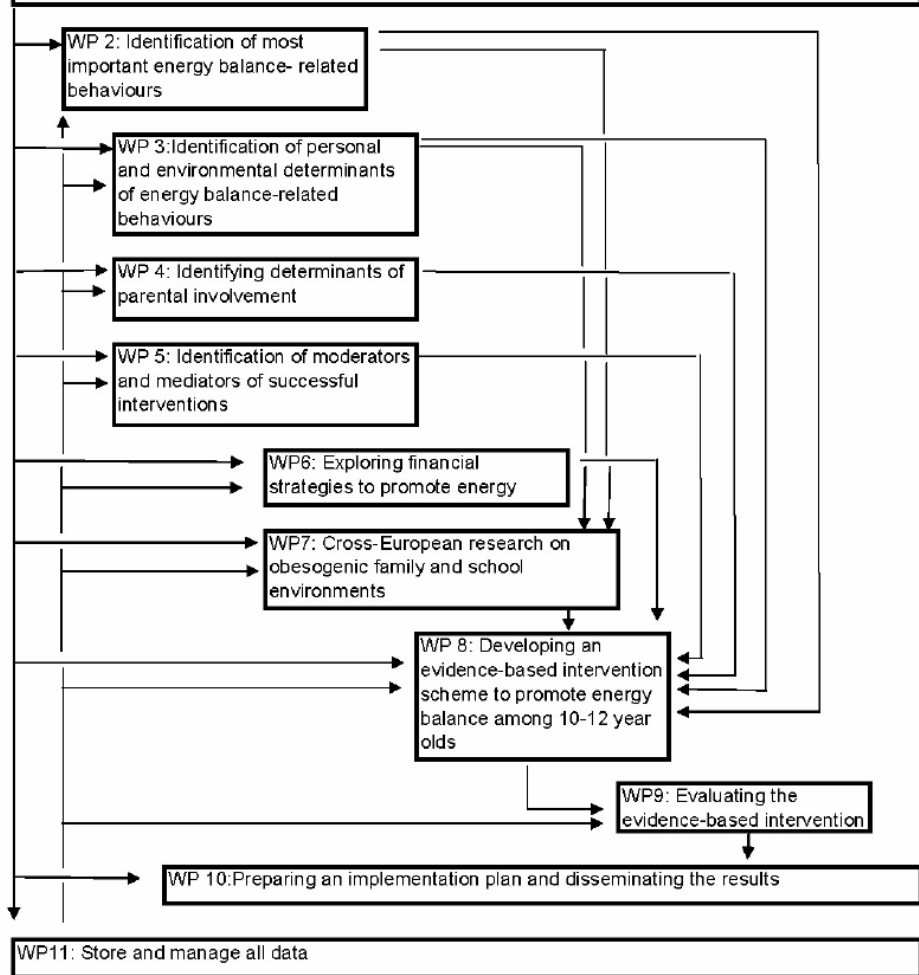

Supplement: MOESM3 [file 9484900]
